# Supplementary material for: Thermal stability, mechanical properties and water content of bacterial protein layers recrystallized on polyelectrolyte multilayers
Source: Royal Society of Chemistry journal article supplement (doi:10.1039/b719408k), 2008-01-01
Supplement: b719408k.pdf [file b719408k.pdf]

One set of AFM measurements showing the structure of SbpA on polyelectrolyte multilayers as a function of temperature. At 55°C the 2D crystal structure is lost. (No flattening or other type of image treatment has been applied to the figures)

T = 20 °C

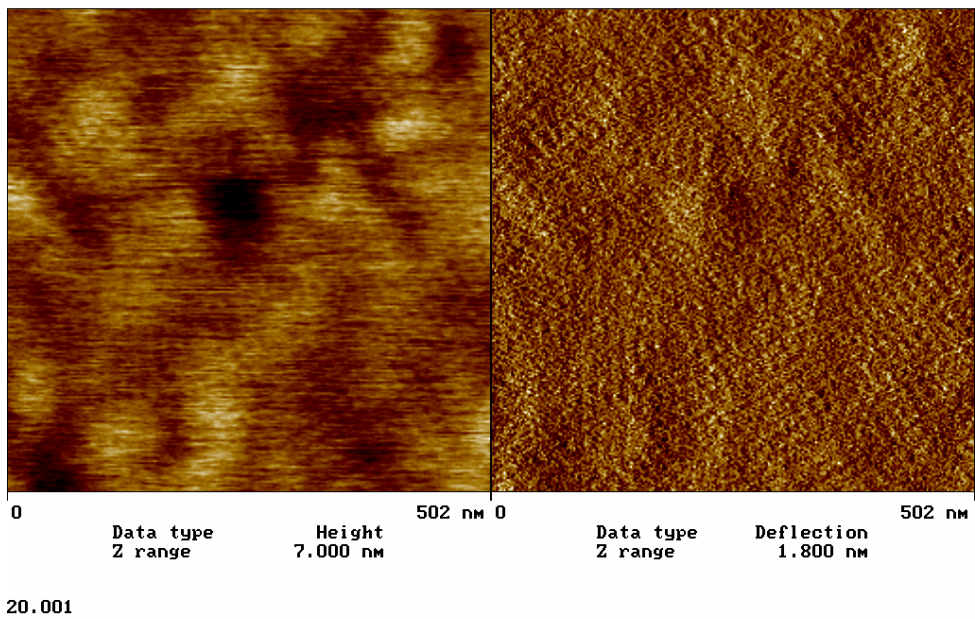

T = 30 °C

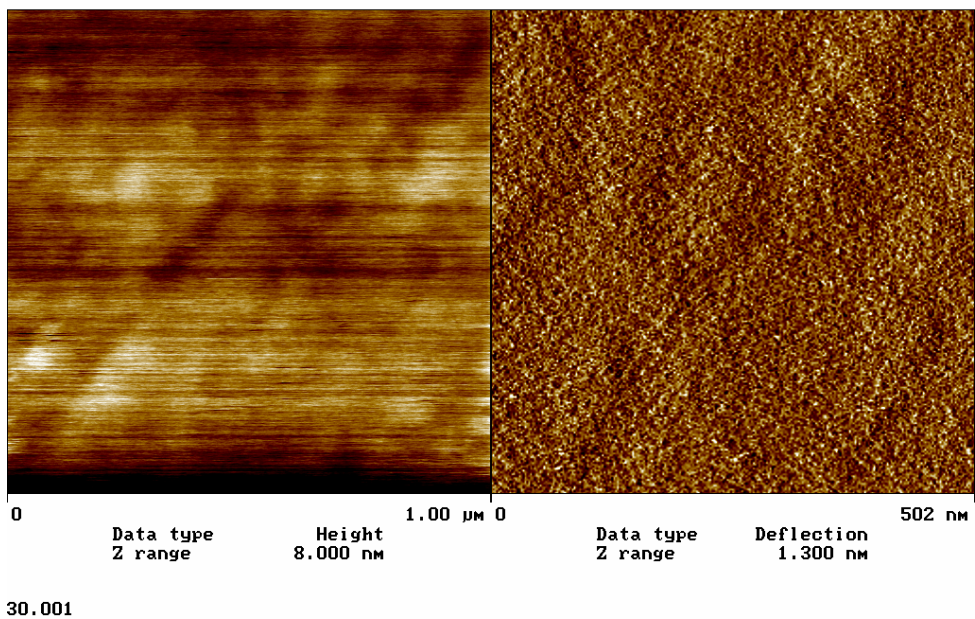

T = 40 °C

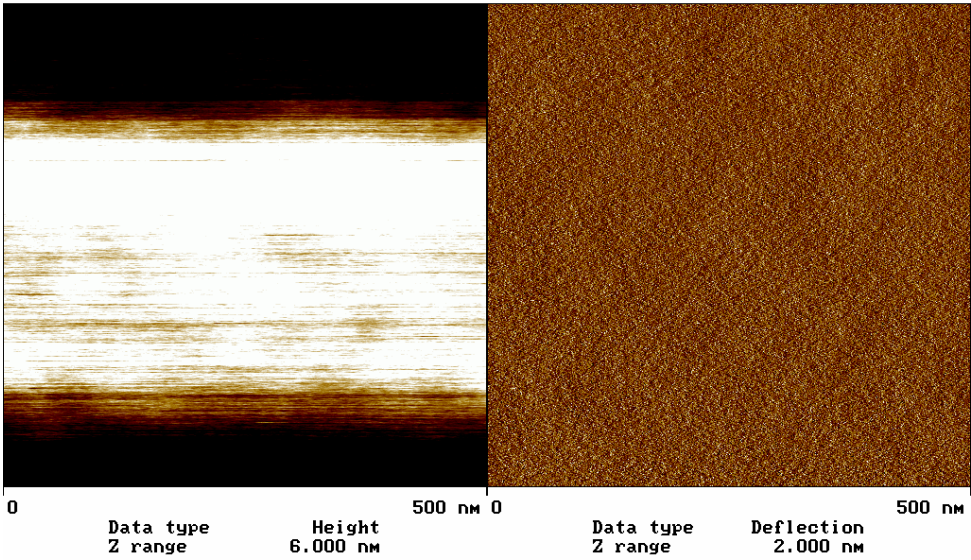

40.002

T = 50 °C

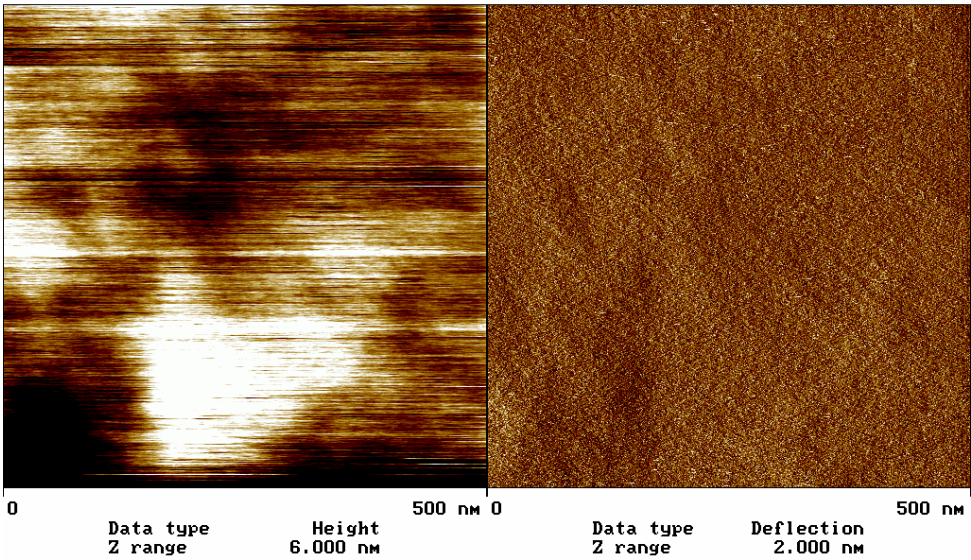

50.001
